# Supplementary material for: Cytotoxicity of sesquiterpene alkaloids from Nuphar plants toward sensitive and drug-resistant cell lines
Source: Royal Society of Chemistry journal article supplement (doi:10.1039/c8fo01804a), 2018-01-01
Supplement: c8fo01804a1.pdf [file c8fo01804a1.pdf]

## Supporting information

### Cytotoxicity of sesquiterpene alkaloids from *Nuphar* plants toward sensitive and drug-resistant cell lines

Masashi Fukaya<sup>a,b</sup>, Seikou Nakamura<sup>a</sup>, Mohamed Elamir F. Hegazy<sup>b,c</sup>, Yoshikazu Sugimoto<sup>d</sup>, Noriko Hayashi<sup>a</sup>, Souichi Nakashima<sup>a</sup>, Masayuki Yoshikawa<sup>a</sup>, Thomas Efferth<sup>b</sup>, and Hisashi Matsuda<sup>a</sup>

---

*a. Kyoto Pharmaceutical University, Misasagi, Yamashina-ku, Kyoto 607–8412, Japan.*

*b. Department of Pharmaceutical Biology, Institute of Pharmacy and Biochemistry, University of Mainz, Staudinger Weg 5, Mainz 55128, Germany.*

*c. Chemistry of Medicinal Plants Department, National Research Centre, 33 El-Bohouth St., Dokki, Giza 12622, Egypt.*

*d. Division of Chemotherapy, faculty of Pharmacy, Keio University, Tokyo, Japan*

\*Corresponding author. Tel.: +81 75 959 4633; Fax: +81 75 595 4768; E-mail address: [matsuda@mb.kyoto-phu.ac.jp](mailto:matsuda@mb.kyoto-phu.ac.jp).

### List of Supporting Information

**S1. Dose response curve of compounds 4-9 against drug sensitive and drug resistant cancer cell lines.**

## S1.Dose response curve of compounds 4–9 against drug sensitive and drug resistant cancer

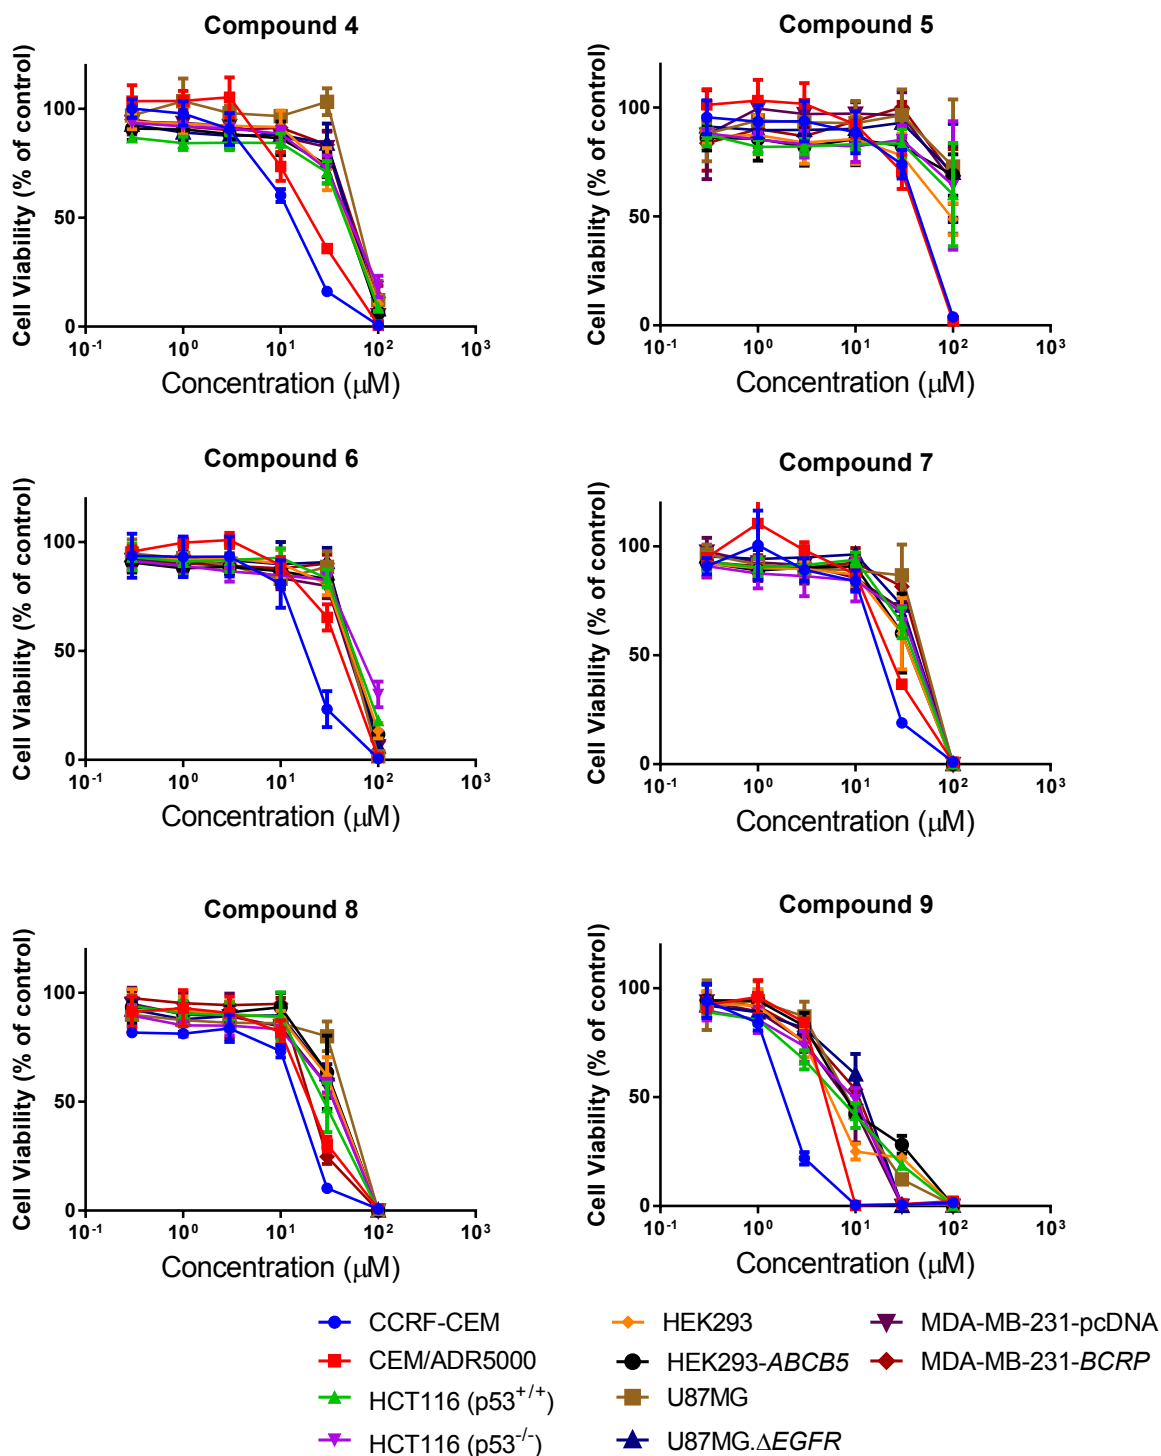

### cell lines.

Dose response curves of compound 4–9 against ten cancer cell lines (CCRF-CEM, CEM/ADR5000, HCT116<sup>(+/+)</sup>, HCT116<sup>(-/-)</sup>, HEK293, HEK293-ABCB5, U87MG, U87MG. $\Delta$ EGFR, MDA-MB-231-*pcDNA* and MDA-MB-231-*BCRP*) from resazurin reduction assay. Cells were tested in from 0.3 to 100  $\mu\text{M}$  in three-fold dilution. The curves were generated by plotting mean cell viability against each concentration. The results are mean values of three independent experiments.
